# Supplementary material for: The explicit examination of the magnetic states of electrides
Source: Royal Society of Chemistry journal article supplement (doi:10.1039/c6cp05345a), 2016-01-01
Supplement: c6cp05345a1.pdf [file c6cp05345a1.pdf]

**Supporting Information: The explicit examination of the magnetic states of electrides**

Stephen G. Dale<sup>1, a)</sup> and Erin R. Johnson<sup>2, b)</sup>

<sup>1)</sup>*Chemistry and Chemical Biology, School of Natural Sciences,  
University of California, Merced, 5200 North Lake Road, Merced, California 95343,  
USA*

<sup>2)</sup>*Department of Chemistry, Dalhousie University, 6274 Coburg Rd,  
P.O.Box 15000 B3H 4R2, Halifax, Nova Scotia, Canada*

(Dated: 1 August 2016)

---

<sup>a)</sup>Electronic mail: [sdale@ucmerced.edu](mailto:sdale@ucmerced.edu)

<sup>b)</sup>Electronic mail: [erin.johnson@dal.ca](mailto:erin.johnson@dal.ca)

FIG. 1: The electron density of  $\text{Li}^+(\text{cryptand-2.1.1})\text{e}^-$  is plotted in the x (across the page with respect to Figure 2 in the article), y (up the page) and z (into the page) directions. Vertical blue lines show the location of the non-nuclear maxima identified in our previous work.<sup>1</sup>

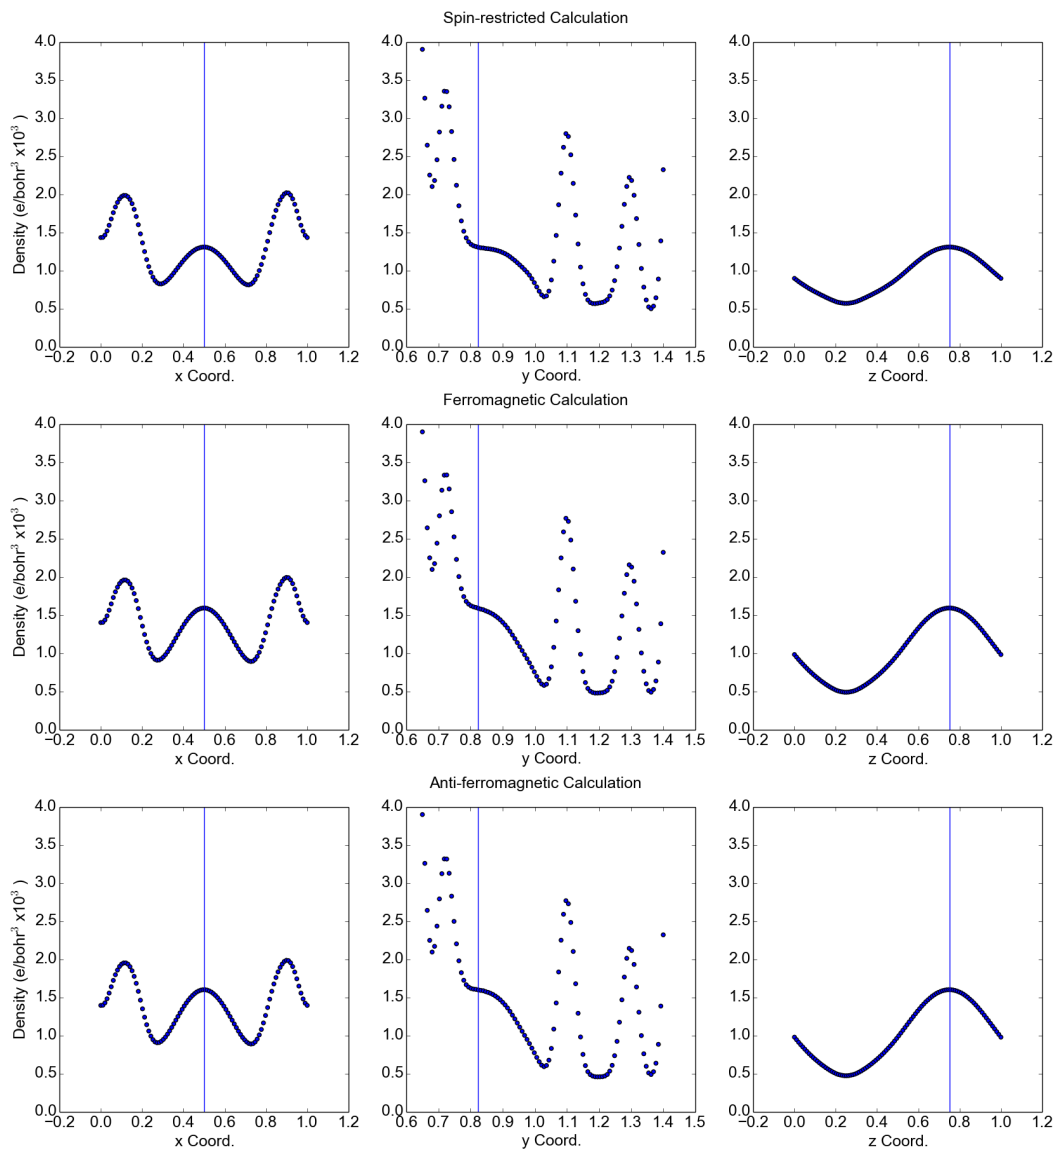

## REFERENCES

- <sup>1</sup>S. G. Dale, A. Otero-de-la Roza, and E. R. Johnson, *Phys. Chem. Chem. Phys.* **16**, 14584 (2014).
